# Supplementary material for: Sodium taurocholate cotransporting polypeptide (NTCP) deficiency: Identification of a novel SLC10A1 mutation in two unrelated infants presenting with neonatal indirect hyperbilirubinemia and remarkable hypercholanemia
Source: PubMed Central journal article supplement (PMC5739759; doi:10.18632/oncotarget.22503), 2017-11-18
Supplement: oncotarget-08-106598-s001.pdf [file oncotarget-08-106598-s001.pdf]

## Sodium taurocholate cotransporting polypeptide (NTCP) deficiency: Identification of a novel *SLC10A1* mutation in two unrelated infants presenting with neonatal indirect hyperbilirubinemia and remarkable hypercholanemia

### SUPPLEMENTARY MATERIALS

**Supplementary Table 1: PCR primers and conditions for the sequencing analysis of UGT1A1 gene\***

| Targets  | Primer sequences (5' to 3')                                               | AT (°C) | Polymerase | Products (bp) |
|----------|---------------------------------------------------------------------------|---------|------------|---------------|
| Promotor | Forward: AATGGATCCTGAGGTTCTGG<br>Reverse: CTGGGTAGCCTCAAATTCCA            | 58      | Taq        | 834           |
| Exon 1   | Forward: AGGAGCAAAGGCGCCATGGC<br>Reverse: TGCCAAAGACAGACTCAAACC           | 58      | Taq        | 1042          |
| Exon 2   | Forward: AACACGCATGCCTTTAATCATA<br>Reverse: TGACAACAACCACAACAACAAA        | 56      | Taq        | 416           |
| Exon 3   | Forward: GAAGTTGCCAGTCCTCAGAAG<br>Reverse: TGTTGGCCATAATATTTTCAAGC        | 56      | Taq        | 356           |
| Exon 4   | Forward: AACACTGAGTCTTTGGAGTGTTTTTC<br>Reverse: TATTTGAAACAACGCTATTAATGCT | 56      | Taq        | 420           |
| Exon 5   | Forward: CAGGTTTCCTTTCCCAAGTTT<br>Reverse: GAAGGCGTGTGTGTGTGAAC           | 60      | Taq        | 1280          |

AT, annealing temperature; bp, base pairs.

\*Based on the reference: Minucci A, Canu G, Gentile L, *et al.* Identification of a novel mutation in UDP- glucuronosyl transferase (UGT1A1) gene in a child with neonatal unconjugated hyperbilirubinemia. *Clinical Biochemistry*. 2013; 46:170–172.

| Rodents and lagomorphs                 | Peptide                | From | Amino acid sequence                        | To                   |
|----------------------------------------|------------------------|------|--------------------------------------------|----------------------|
| Mouse                                  | ENSMUSP00000093229     | 61   | VIIAIVAQYGIPLSAFLLGKVFHLTSIEALA <b>I</b>   | LICGCSPPGGNLSNLF 108 |
| Ryukyu mouse                           | MGP_CAROLIEiJ_P0032680 | 61   | VIIAIVAQYGIPLSAFLLGKVFHLTSIEALA <b>I</b>   | LICGCSPPGGNLSNLF 108 |
| Shrew mouse                            | MGP_PahariEiJ_P0082793 | 61   | VIIAMVAQYGIPLSAFLLGKVFRLTNIIEALA <b>I</b>  | LICGCSPPGGNLSNLF 108 |
| Pika                                   | ENSOPRP00000007592     | 61   | LAIALVAQYGIPLTAFVLGKAFQMSKIEALA <b>I</b>   | LICGCSPPGGNLSNLF 108 |
| Rabbit                                 | ENSOCUP00000008010     | 61   | LAIALVAQYGIPLTAFVLGKVFRLTNIIEALA <b>I</b>  | LICGCSPPGGNLSNLF 108 |
| Brazilian guinea pig                   | ENSCAPP00000009872     | 61   | LAIAMVAQYGIPLIAFLLGKVFSLTNIIEALA <b>I</b>  | LICGCSPPGGNLSNLF 108 |
| Chinese hamster CriGri                 | ENSCGRP00000012937     | 61   | VVIAMLSQYGIPLAFAFVLGKAFHLKPIEALA <b>I</b>  | LICGCSPPGGNLSNLF 108 |
| Chinese hamster CHOK1GS                | ENSCGRP0000001018980   | 61   | VVIAMLSQYGIPLAFAFVLGKAFHLKPIEALA <b>I</b>  | LICGCSPPGGNLSNLF 108 |
| Damara mole rat                        | ENSFDAP00000016479     | 68   | ITIGFLCQFGIMPLTGFVLSVAFGILPVQAVV <b>V</b>  | IMGCCPPGGASSNVV 115  |
| Degu                                   | ENSODEP00000018011     | 61   | LTIAMVAQYGIPLAFAFLLGKAFRLSNIIEALT <b>L</b> | LICGCSPPGGNLSNLF 108 |
| Golden Hamster                         | ENSMAUP00000013002     | 61   | VVIAMLSQYGIPLAFAFVLGKVFHLKPIEALA <b>I</b>  | LICGCSPPGGNLSNLF 108 |
| Guinea Pig                             | ENSCPOP00000005370     | 61   | LAIAMVAQYGIPLTAFVLGKVFSLTNIIEALA <b>I</b>  | LICGCSPPGGNLSNLF 108 |
| Kangaroo rat                           | ENSODORP00000008282    | 69   | IFVGFLLCQFGIMPLMGFLLSVAFHIIPIQAVV <b>V</b> | LIMGCCPPGGTASNVL 116 |
| Long-tailed chinchilla                 | ENSCLAP00000006689     | 61   | LAVAMVAQYGIPLTAFALGKMFRLNIEALA <b>I</b>    | LICGCSPPGGNLSNLF 108 |
| Naked mole-rat male                    | ENSHGLP00100024369     | 61   | LATAMVAQYGIPLPFAFMLGKVFRLNIEALA <b>I</b>   | LICGCSPPGGNLSNLF 108 |
| Naked mole-rat female                  | ENSHGLP00000013534     | 61   | LATAMVAQYGIPLPFAFMLGKVFRLNIEALA <b>I</b>   | LICGCSPPGGNLSNLF 108 |
| Northern American deer mouse           | ENSPEMP00000022966     | 61   | VVIAMLSQYGIPLTAFVLGKVFRLTNIIEALA <b>I</b>  | LICGCSPPGGNLSNLF 108 |
| Prairie vole                           | ENSMOCP00000016238     | 61   | VVIAMLSQYGIPLAFAFVLGKVFRLNPIEALA <b>I</b>  | LICGCSPPGGNLSNLF 108 |
| Rat                                    | ENSRNOP00000007825     | 61   | VIVALVAQYGIPLAFAFLLGKIFHLSNIEALA <b>I</b>  | LICGCSPPGGNLSNLF 108 |
| Lesser Egyptian jerboa                 | ENSJJAP00000005005     | 61   | LIIALVVSQYGIPLTAFVLGKVFRLTNIIEALA <b>I</b> | LICGCSPPGGNLSNLF 108 |
| Squirrel                               | ENSSTOP00000003472     | 61   | LAIAMVAQYGIPLTAFVLGKVFQLNIEALA <b>I</b>    | LICGCSPPGGNLSNLF 108 |
| Upper Galilee mountains blind mole rat | ENSNAP00000000640      | 61   | LLIAMVAQYGIPLAFAFVLGKVFKLSNIEALA <b>I</b>  | LICGCSPPGGNLSNLF 108 |

| Other mammals          | Peptide            | From | Amino acid sequence                        | To                   |
|------------------------|--------------------|------|--------------------------------------------|----------------------|
| Cat                    | ENSFCAP00000008204 | 61   | LAIALIAQYGIPLTAFALGKVFQLNIEALA <b>I</b>    | LVCGCSPPGGTLSNLF 108 |
| Dog                    | ENSCAFP00000024409 | 61   | LVIALIAQYGIPLTAFLLGKVFRLNIEALA <b>I</b>    | LVCGCSPPGGTLSNLF 108 |
| Ferret                 | ENSMPUP00000007411 | 61   | LAIALMAQYGIPLTAFLLGKVFRLNIEALA <b>I</b>    | LVCGCSPPGGTLSNLF 108 |
| Panda                  | ENSAMEP00000015380 | 61   | LAIALIAQYGIPLTAFLLGKVFRLNIEALA <b>I</b>    | LVCGCSPPGGTLSNLF 108 |
| Alpaca                 | ENSVPAP00000005985 | 61   | LAIALVAQYGIPLTAFSLGKLFRLNIEALA <b>I</b>    | LICGCSPPGGNLSNLF 108 |
| Cow                    | ENSBTAP00000002446 | 61   | LAVALVAQYGIPLTAFGLGKFFQLNVEALA <b>I</b>    | LICGCSPPGGNLSNLF 108 |
| Dolphin                | ENSTTRP00000005928 | 68   | IAAGLLCQFGIMPLTAYLLVLSFSLKPVQAMA <b>I</b>  | LIMGCCPPGGTISNLF 115 |
| Horse                  | ENSECAP00000012659 | 61   | LAIALVAQYGIPLTAFALGKVFQLNVEALA <b>I</b>    | LVCGCSPPGGNLSNLF 108 |
| Pig                    | ENSSSCP00000002511 | 61   | LAIALVAQYGIPLTAFALGKLFRLNVEALA <b>I</b>    | LICGCSPPGGNLSNLF 108 |
| Sheep                  | ENSOARP00000022773 | 61   | LAVALVAQYGIPLTAFGLGKFFQLNVEALA <b>I</b>    | LICGCSPPGGNLSNLF 108 |
| Armadillo              | ENSNDOP00000004782 | 61   | LVIALVAQYGIPLTAFVLGKVFRLNIEALA <b>I</b>    | LICGCSPPGGTLSNLF 108 |
| Elephant               | ENSLAFP00000017315 | 61   | LVALVAQYGIPLTAFGLGKLFRLNVEALA <b>I</b>     | LICGCSPPGGNLSNLF 108 |
| Hedgehog               | ENSEEUP00000005963 | 68   | IFVGFLLCQFGIMPLTGFLLSVAFGILPLQAVV <b>V</b> | LIMGCCPPGGTASNLF 115 |
| Hyrax                  | ENSPCAP00000004134 | 61   | LAIALVAQYGIPLTAFALGKLFRLNIEALA <b>I</b>    | LICGCSPPGGNLSNLF 108 |
| Lesser hedgehog tenrec | ENSETEP00000012656 | 61   | LAIALVAQYGIPLTAFSLGKLFRLNIEALA <b>I</b>    | LICGCSPPGGNLSNLF 108 |
| Megabat                | ENSPVAP00000009265 | 61   | LAIALMARYGIPLTAFVLGKVFRLNIEALA <b>I</b>    | LICGSSPPGGNLSNLF 108 |
| Microbat               | ENSMLUP00000010888 | 61   | LAIAMVAQYGIPLTAFALGKLFRLNIEALA <b>I</b>    | LICGCSPPGGNLSNLF 108 |
| Shrew                  | ENSSARP00000000978 | 61   | MIAMVAQYGIPLTAFSLGRIFKLNIEALA <b>I</b>     | LVCGCSPPGGNLSNLF 108 |
| Sloth                  | ENSCHOP00000004848 | 61   | LAIALVAQYGIPLTAFALGKVFRLNIEALA <b>I</b>    | LICGCSPPGGNLSNLF 108 |
| Tree Shrew             | ENSTBEP00000002346 | 61   | LAIALLAQYGIPLTAFALGKVFPLNIEALA <b>I</b>    | LVCGCSPPGGNLSNLF 108 |
| Opossum                | ENSMODP00000014214 | 69   | IIIALVVSQYGVMLTAFSLGKIFHLNVEALA <b>I</b>   | LICGCSPPGGTLSNLF 116 |
| Platypus               | ENSOANP00000017942 | 76   | IIVGFLLCQFGIMPLTGFLLSLAFNVLPVQAVV <b>I</b> | IIMGCCPPGGTASNLF 123 |
| Tasmanian devil        | ENSSHAP00000003547 | 69   | IAIALVVSQYGVMLTAFALGKIFQLNIEALA <b>I</b>   | LICGCSPPGGTLSNLF 116 |
| Wallaby                | ENSMEUP00000007961 | 61   | IAIALVVSQYGVMLTAFALGKIFRLNVEALA <b>I</b>   | LICGCSPPGGTLSNLF 108 |

| Other vertebrates        | Peptide             | From | Amino acid sequence                                         | To  |
|--------------------------|---------------------|------|-------------------------------------------------------------|-----|
| Anole lizard             | ENSACAP00000005008  | 37   | VMAAVSQFGIMMPLTAFALSIFRLAPMEALT <b>V</b> FIGCCPPGGTLSNIL    | 84  |
| Chinese softshell turtle | ENSPSIP00000003539  | 76   | ICVGFLCQFGIMPLTGFVLALLFNVLPAQAVA <b>V</b> LIMGCCPPGGTSSNIL  | 123 |
| Chicken                  | ENSGALP00000054869  | 70   | IFVGFLCQFGIMPLTAFLLSLAFDVHPIQAVV <b>V</b> MIMGCCPPGGTASNII  | 117 |
| Duck                     | ENSAPLP00000014650  | 70   | VAVAVMSQYGVMPPLTAFVLGKLFQLGPTESLA <b>I</b> LICGCCPPGGNLSNIF | 117 |
| Flycatcher               | ENSFALP00000005168  | 62   | VAVAIMAQYSIMPLTAFILGKLFQLGTSESLA <b>I</b> LICGCCPPGGNLSNIF  | 109 |
| Turkey                   | ENSMGAP00000012582  | 58   | VLLALLGQFVAMPLVAFLLALIFALDEVAAVA <b>V</b> LLCGCCPPGGNLSNLM  | 105 |
| Zebra Finch              | ENSTGUP00000011770  | 44   | VAIAVLVQYSIMPLTAFILGKLFQLGTSESLA <b>I</b> LICGCCPPGGNLSNIF  | 91  |
| Amazon molly             | ENSPFOP00000017822  | 79   | VAIAILSQYQIMPLTAFCLTKGFQLSEATAVV <b>I</b> LICGCCPPGGALSNIL  | 126 |
| Cave fish                | ENSAMP00000012264   | 75   | VAIAVVAQYQIMPLSAFSLAKLLQLGPMETVA <b>V</b> LVCGCCPPGGNLSNIL  | 122 |
| Cod                      | ENSGMOP00000017105  | 62   | VAIAVVAQFGIMPLTAFCLATVFKLEQIEVLT <b>V</b> LICGCCPPGGNLSNIF  | 109 |
| Coelacanth               | ENSLACP00000008119  | 76   | MAIAVVAQYQIMPLTAFALAKAFKLPTIESVT <b>V</b> LICGCCPPGGNLSNIF  | 123 |
| Fugu                     | ENSTRUP00000037654  | 46   | VAIALVAQFGIMPLTAFGLAKFLQMDAIKAVT <b>V</b> LICGCCPPGGTLSNIF  | 93  |
| Medaka                   | ENSORLP00000021052  | 101  | VAIALLAQFFIMPLSAFCLAKVLQMDPIKAVT <b>V</b> LICGCCPPGGTLSNIF  | 148 |
| Platy fish               | ENSXMAP00000007841  | 71   | VAIAILSQYQIMPLTAFCLTKGFQVPEATAVV <b>I</b> LICGCCPPGGAMSNIL  | 117 |
| Spotted gar              | ENSLOCP00000015305  | 76   | VGIAVIAQYGVMPITAFALAKMFQLGAEIAVT <b>V</b> LICGCCPPGGNLSNIF  | 123 |
| Stickleback              | ENSGACP00000010376  | 83   | LIIAVVSQYVVMPLVAFCLVQAFQLTEIRAVV <b>V</b> LICGCCPPGGNLSNIL  | 130 |
| Tetraodon                | ENSTNIP00000020983  | 72   | IVVGFLCQFGIMPFTAFALALAFQVI PVQAVV <b>I</b> IIMGCCPPGGTGSNII | 119 |
| Tilapia                  | ENSONIP00000007266  | 82   | VAIAVVAQYQIMPLTAFCLAKLFKLAIEIAVV <b>I</b> LICGCCPPGGALSNIL  | 129 |
| Zebrafish                | ENSDDARP00000047825 | 72   | VVIAVGAQYQIMPFTAFCLAKLFRLSPMESLS <b>V</b> LICGCCPPGGNLSNIF  | 119 |
| Xenopus                  | ENSXETP00000059800  | 69   | IGIALFSQFGIMPLAAFLAHVFLQNAIESVT <b>V</b> LICGCCPPGGVLSVVF   | 116 |
| Lamprey                  | ENSPMAP00000005222  | 76   | IFIAVLAQFGIMPLTAFALAKVFRLNPVEAVT <b>V</b> LICGCCPPGGNLSNVF  | 123 |

| Other species          | Peptide             | From | Amino acid sequence                                        | To  |
|------------------------|---------------------|------|------------------------------------------------------------|-----|
| Caenorhabditis elegans | Y71G10AR.4 pep      | 219  | PGIGLFAQFIIMPLLSYLIAYAIFMPRGLYSM <b>A</b> LGLFVTGCSPPGGAS  | 266 |
| Ciona intestinalis     | ENSCINP00000008688  | 45   | IATAASCQFGIMPFISFLMAKIFGLDKVAAIA <b>V</b> LVTGCCPPGGNLSNLL | 93  |
| Ciona savignyi         | ENSCSAVP00000001569 | 61   | IALVAQFLIMPASAFGLTQAFQLDYAAIAVL <b>I</b> CGCCPPGGNLSNMLAY  | 108 |
| Fruitfly               | FBpp0074072         | 188  | PVVGVSREVLMPAVGFLGRALWPDSPWLQLA <b>L</b> FYTALSPSGGLANVC   | 235 |

**Supplementary Figure 1: Comparative alignment of the homologous peptides in rodents and lagomorphs, other mammals, other vertebrates as well as other species.**
